# Supplementary material for: NEAT1 Confers Radioresistance to Hepatocellular Carcinoma Cells by Inducing Autophagy through GABARAP
Source: MDPI journal article supplement (doi:10.3390/ijms23020711), 2022-01-10
Supplement: s1 [file s1]

**Table S1 Oligo DNAs used in the present study****Oligo DNAs for adenovirus vector construction***BsaI-linker*

|        |                                                    |
|--------|----------------------------------------------------|
| BsaI-U | CACCGGAGACCACGAATTCACACTGGGTCTCGTTTCCAGTAGATCTCCAG |
| BsaI-D | AAAACTGGAGATCTACTGGAAACGAGACCCAGTGTGAATTCGTGGTCTCC |

*AmCyan cloning primers*

|            |                                |
|------------|--------------------------------|
| AmCyan_For | GGACAGGGATCCGGTAAGCGGCAGGGT    |
| AmCyan_Rev | GACGTTGGATCCACGTTCTTTAATAGTGGA |

*shNT*

|        |                                                           |
|--------|-----------------------------------------------------------|
| shNT-U | CACCGGGCGCGATAGCGCTAATAATTTCTCGAGAAATTATTAGCGCTATCGCGCTTT |
| shNT-D | GAAAAAAGCGCGATAGCGCTAATAATTTCTCGAGAAATTATTAGCGCTATCGCGCCC |

*shNEAT1a*

|            |                                                           |
|------------|-----------------------------------------------------------|
| shNEAT1a-U | CACCGGGGAGTCGGTATTGTTGGTAATCTCGAGATTACCAACAATACCGACTCCTTT |
| shNEAT1a-D | GAAAAAAGGAGTCGGTATTGTTGGTAATCTCGAGATTACCAACAATACCGACTCCCC |

*shNEAT1b*

|            |                                                          |
|------------|----------------------------------------------------------|
| shNEAT1b-U | CACCGGATGGACCGTGGTTTGTACTACTCGAGTAGTAACAAACCACGGTCCATTTT |
| shNEAT1b-D | GAAAAAAATGGACCGTGGTTTGTACTACTCGAGTAGTAACAAACCACGGTCCATCC |

*shGBRPa*

|           |                                                           |
|-----------|-----------------------------------------------------------|
| shGBRPa_U | CACCGGCACCATGAAGAAGACTTCTTTCTCGAGAAAGAAGTCTTCTTCATGGTGTTT |
| shGBRPa_D | GAAAAAACACCATGAAGAAGACTTCTTTCTCGAGAAAGAAGTCTTCTTCATGGTGCC |

*shGBRPb*

|           |                                                           |
|-----------|-----------------------------------------------------------|
| shGBRPb_U | CACCGGGTGCCTTCTGATCTCACAGTTCTCGAGAACTGTGAGATCAGAAGGCACTTT |
| shGBRPb_D | GAAAAAAGTGCCTTCTGATCTCACAGTTCTCGAGAACTGTGAGATCAGAAGGCACCC |

**qPCR primers**

| <i>Adenovirus titration</i> | <i>forward</i>         | <i>reverse</i>         |
|-----------------------------|------------------------|------------------------|
| AdE2B_Titer                 | TGTCAAGCTTGGTGGCAAAC   | TCGCGACAAAAACCAAACCC   |
| <i>mRNA determination</i>   | <i>sense</i>           | <i>antisense</i>       |
| β-actin                     | GATGCAGAAGGAGATCACTGC  | TGATCCACATCTGCTGGAAG   |
| CD13                        | CTGCAGCAAAGAGTTGTGGATC | TTGCCCAATGACGTTGTTGG   |
| CD90                        | TGAGATCCCAGAACCATGAACC | TATTCTCATGGCGGCAGTCC   |
| CD44                        | AAGGTGGAGCAAACACAACC   | TCGACTGTTGACTGCAATGC   |
| CD133                       | AATTCACCAGCAACGAGTCC   | AATCCATTCCCTGTGCGTTG   |
| EPCAM                       | ATAACCTGCTCTGAGCGAGTG  | AACGCGTTGTGATCTCCTTC   |
| GABARAP                     | ACAATGGGTCAGCTGTACCAG  | AGACCGTAGACACTTTCGTCAC |
| total NEAT1                 | TGCCACAACGCAGATTGATG   | ACAAGAAGGCAGGCAAACAG   |
| NEAT1v2                     | AGGGTTCTGTTGCTAACACG   | TGCCGATGAAGCAACAAAGC   |
